# Supplementary material for: Systematic investigation of the relationships of trimethylamine N-oxide and l-carnitine with obesity in both humans and rodents
Source: Royal Society of Chemistry journal article supplement (doi:10.1039/d0fo01743d), 2020-01-01
Supplement: d0fo01743d1.pdf [file d0fo01743d1.pdf]

**Supplemental Table 1.** Composition of experimental diets

| Ingredients (g/kg)       | Con | HFD | TMAO | L-carnitine |
|--------------------------|-----|-----|------|-------------|
| Casein                   | 200 | 200 | 200  | 200         |
| Cornstarch               | 450 | 250 | 247  | 245         |
| Sucrose                  | 200 | 200 | 200  | 200         |
| Corn oil                 | 50  | 50  | 50   | 50          |
| Lard                     | 0   | 200 | 200  | 200         |
| Mineral mix              | 35  | 35  | 35   | 35          |
| Vitamin mix              | 10  | 10  | 10   | 10          |
| Cellulose                | 50  | 50  | 50   | 50          |
| Choline bitartrate       | 2   | 2   | 2    | 2           |
| DL-methionine            | 3   | 3   | 3    | 3           |
| TMAO • 2H <sub>2</sub> O | --  | --  | 3    | --          |
| L-Carnitine              |     |     |      | 5           |

**Supplemental Table 2.** Primers used during the real-time PCR assay

| Gene     | Forward/reverse primer            |
|----------|-----------------------------------|
| SREBP-1c | 5'-GTG AGC CTG ACA AGC AAT CA-3'  |
|          | 5'-ACC AAG CCA GCA AAT ACA CC-3'  |
| FAS      | 5'- CTT CGC CAA CTC TAC CAT GG-3' |
|          | 5'- TTC CAC ACC CAT GAG CGA GT-3' |

---

|                |                                   |
|----------------|-----------------------------------|
| ACC-1          | 5'- ATC CAG GCC ATG TTG AGA CG-3' |
|                | 5'- AGA TGT GCT GGG TCA TGT GG-3' |
| PPAR- $\alpha$ | 5'-CAG CGA GTA GCG CAT AGT CA-3'  |
|                | 5'- GGA TGT CAC ACA CAA TTC -3'   |
| ATGL           | 5'- AAC ACC AGC ATC CAG TTC AA-3' |
|                | 5'- GGT TCA GTA GGC CAT TCC-3'    |
| CPT-1          | 5'-AAA GAT CAA TVG GAC CCT AGA-3  |
|                | 5'-CAG CGA GTA GCC CAT AGT CA-3   |
| $\beta$ -actin | 5'-GCAGATGTGGATCAGCAAGC-3'        |
|                | 5'-GTCAAAGAA AGGGTGTA A ACG-3'    |

---
